# Supplementary material for: Thermodynamics of protein model compounds: An investigation of the apparent and partial molar heat capacities and volumes of aqueous solutions of alanyl and seryl side-chain containing cyclic dipeptides
Source: Royal Society of Chemistry journal article supplement (doi:10.1039/b103629g), 2001-01-01
Supplement: tables.doc [file tables.doc]

**Table S1.** Relative densities, (), apparent molar volumes, *V*2,ø, heat capacity ratios, () – 1, and apparent molar heat capacities, *Cp*2,ø, for aqueous solutions of c(GlySer) at 288.15, 298.15, 313.15, and 328.15 Ka.

| *m*  (mol kg-1) | ()  (g cm-3) | *V*2,ø  (cm3 mol-1) | 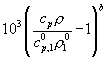b | *Cp*2,ø  (J K-1 mol-1) |
| --- | --- | --- | --- | --- |
| 288.15 K | | | | |
| 0.02728 | 0.001379 | 93.50 (0.18) | -1.398 | 173.6 (13.1) |
| 0.03512 | 0.001773 | 93.51 (0.14) | -1.755 | 178.9 (7.8) |
| 0.04009 | 0.002023 | 93.51 (0.13) | -2.036 | 175.4 (4.0) |
| 0.04489 | 0.002264 | 93.52 (0.11) | -2.228 | 180.3 (6.8) |
| 0.04999 | 0.002515 | 93.63 (0.10) | -2.508 | 178.4 (4.4) |
| 0.06026 | 0.003027 | 93.66 (0.08) | -- | -- |
| 0.07102 | 0.003564 | 93.65 (0.07) | -3.549 | 178.9 (2.0) |
| 0.07996 | 0.003998 | 93.80 (0.06) | -4.011 | 178.5 (1.0) |
| 0.08566 | 0.004283 | 93.77 (0.06) | -4.295 | 178.3 (1.2) |
| 298.15 K | | | | |
| 0.03472 | 0.001708 | 94.90 (0.15) | -1.563 | 204.7 (3.3) |
| 0.04012 | 0.001974 | 94.87 (0.13) | -1.825 | 202.4 (2.4) |
| 0.04475 | 0.002200 | 94.90 (0.11) | -2.024 | 203.6 (2.0) |
| 0.04995 | 0.002455 | 94.88 (0.10) | -2.250 | 204.2 (2.2) |
| 0.06018 | 0.002946 | 95.04 (0.08) | -2.709 | 204.8 (3.4) |
| 0.06998 | 0.003427 | 94.97 (0.07) | -3.139 | 205.0 (1.5) |
| 0.07931 | 0.003872 | 95.08 (0.06) | -3.536 | 206.4 (1.7) |
| 0.08598 | 0.004206 | 94.95 (0.06) | -3.848 | 205.1 (1.6) |
| 313.15 K | | | | |
| 0.02515 | 0.001210 | 96.26 (0.20) | -0.975 | 234.9 (8.7) |
| 0.03230 | 0.001554 | 96.24 (0.16) | -1.251 | 235.0 (1.8) |
| 0.04011 | 0.001923 | 96.38 (0.13) | -1.581 | 232.5 (4.5) |
| 0.05511 | 0.002635 | 96.44 (0.09) | -2.161 | 233.4 (1.6) |
| 0.06294 | 0.003018 | 96.26 (0.08) | -2.499 | 231.1 (2.6) |
| 0.07028 | 0.003363 | 96.32 (0.07) | -2.754 | 232.8 (3.2) |

**Table S1 (cont.)**

| *m*  (mol kg-1) | ()  (g cm-3) | *V*2,ø  (cm3 mol-1) | 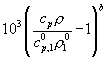 | *Cp*2,ø  (J K-1 mol-1) |
| --- | --- | --- | --- | --- |
| 0.07726 | 0.003693 | 96.35 (0.07) | -3.041 | 232.0 (1.7) |
| 0.08529 | 0.004075 | 96.34 (0.06) | -3.362 | 231.6 (1.3) |
| 328.15 K | | | | |
| 0.02559 | 0.001202 | 97.74 (0.20) | -0.911 | 252.1 (4.7) |
| 0.03244 | 0.001523 | 97.75 (0.16) | -1.140 | 253.9 (3.7) |
| 0.03869 | 0.001816 | 97.75 (0.13) | -1.375 | 252.2 (3.6) |
| 0.04852 | 0.002280 | 97.64 (0.11) | -1.653 | 257.8 (6.2) |
| 0.05760 | 0.002705 | 97.62 (0.09) | -2.045 | 251.6 (4.4) |
| 0.06747 | 0.003170 | 97.55 (0.08) | -2.407 | 253.3 (3.1) |
| 0.07644 | 0.003587 | 97.56 (0.07) | -2.647 | 254.7 (4.5) |
| 0.08494 | 0.003980 | 97.60 (0.06) | -3.000 | 251.7 (3.7) |

a Uncertainties are shown in parentheses.

b Heat capacity ratios have not been corrected using the heat leak correction factor.

**Table S2.** Relative densities, (), apparent molar volumes, *V*2,ø, heat capacity ratios, () – 1, and apparent molar heat capacities, *Cp*2,ø, for aqueous solutions of c(AlaGly) at 288.15, 298.15, 313.15, and 328.15 Ka.

| *m*  (mol kg-1) | ()  (g cm-3) | *V*2,ø  (cm3 mol-1) | 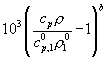b | *Cp*2,ø  (J K-1 mol-1) |
| --- | --- | --- | --- | --- |
| 288.15 K | | | | |
| 0.03001 | 0.001037 | 93.55 (0.17) | -1.365 | 198.3 (4.0) |
| 0.03488 | 0.001206 | 93.48 (0.14) | -1.596 | 196.7 (3.6) |
| 0.04013 | 0.001390 | 93.43 (0.13) | -1.794 | 201.0 (3.2) |
| 0.05005 | 0.001726 | 93.54 (0.10) | -2.271 | 198.4 (2.7) |
| 0.06112 | 0.002104 | 93.56 (0.08) | -2.764 | 198.9 (2.5) |
| 0.07054 | 0.002430 | 93.51 (0.07) | -3.169 | 199.8 (2.9) |
| 0.08091 | 0.002777 | 93.60 (0.06) | -3.618 | 200.8 (3.2) |
| 0.08503 | 0.002915 | 93.63 (0.06) | -3.789 | 201.5 (3.1) |
| 298.15 K | | | | |
| 0.00998 | 0.000333 | 94.96 (0.50) | -0.418 | 218.7 (0.9) |
| 0.01996 | 0.000669 | 94.75 (0.25) | -0.848 | 214.9 (5.7) |
| 0.02980 | 0.001004 | 94.53 (0.17) | -1.246 | 216.7 (2.3) |
| 0.03987 | 0.001339 | 94.61 (0.13) | -1.668 | 216.8 (2.2) |
| 0.05018 | 0.001683 | 94.61 (0.10) | -2.086 | 217.7 (3.1) |
| 0.06057 | 0.002021 | 94.74 (0.08) | -2.541 | 216.3 (1.0) |
| 0.07015 | 0.002337 | 94.77 (0.07) | -2.888 | 219.6 (2.7) |
| 0.08050 | 0.002673 | 94.86 (0.06) | -3.356 | 217.6 (1.5) |
| 0.09064 | 0.003007 | 94.85 (0.06) | -3.735 | 219.4 (1.2) |
| 313.15 K | | | | |
| 0.02499 | 0.000808 | 96.20 (0.20) | -0.903 | 245.9 (2.7) |
| 0.03249 | 0.001050 | 96.20 (0.16) | -1.185 | 244.4 (2.0) |
| 0.04037 | 0.001298 | 96.34 (0.13) | -1.499 | 242.0 (4.1) |
| 0.04806 | 0.001543 | 96.37 (0.11) | -1.767 | 243.6 (3.2) |
| 0.05561 | 0.001777 | 96.51 (0.09) | -2.044 | 244.1 (1.3) |
| 0.07017 | 0.002249 | 96.35 (0.07) | -2.583 | 243.0 (3.4) |
| 0.07872 | 0.002512 | 96.47 (0.07) | -2.888 | 243.9 (1.6) |

**Table S2 (cont.)**

| *m*  (mol kg-1) | ()  (g cm-3) | *V*2,ø  (cm3 mol-1) | 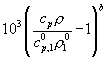 | *Cp*2,ø  (J K-1 mol-1) |
| --- | --- | --- | --- | --- |
| 0.08594 | 0.002748 | 96.39 (0.06) | -3.157 | 243.2 (1.4) |
| 328.15 K | | | | |
| 0.02517 | 0.000785 | 97.82 (0.20) | -0.850 | 260.2 (4.2) |
| 0.03250 | 0.001009 | 97.94 (0.16) | -1.120 | 257.6 (7.4) |
| 0.04027 | 0.001254 | 97.81 (0.13) | -1.401 | 255.6 (2.4) |
| 0.04768 | 0.001480 | 97.90 (0.11) | -1.657 | 256.0 (5.4) |
| 0.05527 | 0.001716 | 97.86 (0.09) | -1.933 | 254.8 (0.8) |
| 0.07169 | 0.002225 | 97.82 (0.07) | -2.499 | 254.9 (1.5) |
| 0.07832 | 0.002433 | 97.77 (0.07) | -2.663 | 258.3 (4.0) |
| 0.08579 | 0.002660 | 97.81 (0.06) | -2.876 | 260.4 (3.2) |

a Uncertainties are shown in parentheses.

b Heat capacity ratios have not been corrected using the heat leak correction factor.

**Table S3.** Relative densities, (), apparent molar volumes, *V*2,ø, heat capacity ratios, () – 1, and apparent molar heat capacities, *Cp*2,ø, for aqueous solutions of c(AlaSer) at 288.15, 298.15, 313.15, and 328.15 Ka.

| *m*  (mol kg-1) | ()  (g cm-3) | *V*2,ø  (cm3 mol-1) | 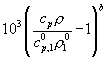 | *Cp*2,ø  (J K-1 mol-1) |
| --- | --- | --- | --- | --- |
| 288.15 K | | | | |
| 0.02477 | 0.001174 | 110.69 (0.20) | -1.013 | 289.3 (12.4) |
| 0.03262 | 0.001546 | 110.66 (0.15) | -1.330 | 289.7 (11.1) |
| 0.03961 | 0.001875 | 110.67 (0.13) | -1.650 | 285.8 (3.8) |
| 0.04736 | 0.002239 | 110.70 (0.11) | -1.925 | 290.1 (5.0) |
| 0.05441 | 0.002571 | 110.68 (0.09) | -2.201 | 290.8 (6.7) |
| 0.06201 | 0.002927 | 110.69 (0.08) | -2.547 | 288.0 (6.1) |
| 0.06964 | -- | -- | -- | 289.0 (3.0)* |
| 0.07747 | 0.003648 | 110.73 (0.07) | -3.223 | 285.6 (7.1) |
| 0.08460 | 0.003978 | 110.76 (0.06) | -3.511 | 286.0 (4.7) |
| 298.15 K | | | | |
| 0.02502 | 0.001163 | 111.66 (0.20) | -0.914 | 310.6 (7.4) |
| 0.03257 | 0.001517 | 111.50 (0.15) | -1.204 | 307.9 (2.2) |
| 0.03975 | 0.001853 | 111.53 (0.13) | -1.459 | 309.0 (0.6) |
| 0.04769 | 0.002221 | 111.53 (0.11) | -1.752 | 308.8 (0.9) |
| 0.05572 | 0.002577 | 111.81 (0.09) | -2.008 | 312.7 (1.2) |
| 0.06327 | 0.002933 | 111.67 (0.08) | -2.284 | 311.8 (1.3) |
| 0.06998 | 0.003233 | 111.73 (0.07) | -2.534 | 311.5 (1.5) |
| 0.07869 | 0.003638 | 111.72 (0.06) | -2.853 | 311.0 (1.1) |
| 0.08550 | 0.003953 | 111.73 (0.06) | -3.043 | 313.8 (4.2) |
| 313.15 K | | | | |
| 0.02505 | 0.001135 | 113.24 (0.20) | -0.782 | 333.0 (2.1) |
| 0.03235 | 0.001467 | 113.17 (0.16) | -1.017 | 336.0 (6.9) |
| 0.03974 | 0.001797 | 113.27 (0.13) | -1.239 | 337.3 (2.0) |
| 0.04795 | 0.002168 | 113.22 (0.11) | -1.487 | 337.7 (3.4) |
| 0.05605 | 0.002525 | 113.34 (0.09) | -0.890 | 335.0 (7.0) |
| 0.06330 | 0.002852 | 113.31 (0.08) | -1.984 | 336.5 (3.1) |

**Table S3 (cont.)**

| *m*  (mol kg-1) | ()  (g cm-3) | *V*2,ø  (cm3 mol-1) | 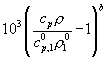 | *Cp*2,ø  (J K-1 mol-1) |
| --- | --- | --- | --- | --- |
| 0.07051 | 0.003175 | 113.31 (0.07) | -2.175 | 338.4 (1.6) |
| 0.07837 | 0.003521 | 113.37 (0.07) | -2.481 | 335.2 (2.0) |
| 0.08531 | 0.003822 | 113.45 (0.06) | -2.677 | 336.6 (0.9) |
| 328.15 K | | | | |
| 0.02512 | 0.001128 | 114.25 (0.21) | -0.731 | 347.7 (7.0) |
| 0.03250 | 0.001455 | 114.38 (0.16) | -0.922 | 351.2 (2.8) |
| 0.04082 | 0.001818 | 114.40 (0.13) | -1.091 | 358.0 (4.0) |
| 0.04701 | 0.002090 | 114.45 (0.11) | -1.250 | 358.8 (5.7) |
| 0.05525 | 0.002459 | 114.36 (0.09) | -1.515 | 354.8 (3.4) |
| 0.06179 | 0.002747 | 114.38 (0.08) | -1.636 | 358.8 (3.4) |
| 0.07006 | 0.003109 | 114.42 (0.07) | -1.821 | 361.0 (2.9) |
| 0.07832 | 0.003473 | 114.42 (0.07) | -2.074 | 358.8 (7.0) |
| 0.08570 | 0.003798 | 114.40 (0.06) | -2.283 | 357.9 (1.0) |

a Uncertainties are shown in parentheses.

b Heat capacity ratios have not been corrected using the heat leak correction factor.

* density obtained from polynomial: **(g cm-3) = 0.999101 + 0.047611*m* – 0.006833*m*2

**Table S4.** Relative densities, (), apparent molar volumes, *V*2,ø, heat capacity ratios, () – 1, and apparent molar heat capacities, *Cp*2,ø, for aqueous solutions of c(SerSer) at 288.15, 298.15, 313.15, and 328.15 Ka.

| *m*  (mol kg-1) | ()  (g cm-3) | *V*2,ø  (cm3 mol-1) | 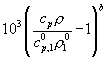 | *Cp*2,ø  (J K-1 mol-1) |
| --- | --- | --- | --- | --- |
| 288.15 K | | | | |
| 0.02262 | 0.001441 | 110.34 (0.22) | -1.159 | 244.0 (3.2) |
| 0.02966 | 0.001888 | 110.34 (0.17) | -1.478 | 249.9 (8.4) |
| 0.03665 | 0.002328 | 110.44 (0.14) | -1.830 | 249.8 (4.3) |
| 0.04360 | 0.002772 | 110.32 (0.12) | -2.216 | 245.3 (3.8) |
| 0.05009 | 0.003173 | 110.51 (0.10) | -2.561 | 244.6 (4.8) |
| 0.05714 | 0.003624 | 110.38 (0.09) | -2.933 | 243.1 (3.6) |
| 0.06609 | 0.004187 | 110.38 (0.08) | -3.327 | 247.1 (4.5) |
| 0.07750 | 0.004900 | 110.44 (0.07) | -3.898 | 247.2 (5.0) |
| 0.08568 | 0.005410 | 110.47 (0.06) | -4.415 | 241.9 (3.9) |
| 298.15 K | | | | |
| 0.02504 | 0.001555 | 112.02 (0.20) | -1.151 | 272.0 (2.8) |
| 0.04001 | 0.002485 | 112.04 (0.13) | -1.822 | 273.6 (3.2) |
| 0.04771 | 0.002956 | 112.08 (0.11) | -2.199 | 271.4 (4.8) |
| 0.05535 | 0.003430 | 112.02 (0.09) | -2.510 | 274.0 (2.6) |
| 0.06315 | 0.003906 | 112.02 (0.08) | -2.896 | 271.7 (3.4) |
| 0.07026 | 0.004349 | 111.92 (0.07) | -3.196 | 272.7 (2.3) |
| 0.07829 | 0.004839 | 111.96 (0.06) | -3.540 | 273.9 (3.1) |
| 0.08625 | 0.005331 | 111.91 (0.06) | -3.884 | 274.3 (1.7) |
| 313.15 K | | | | |
| 0.03347 | 0.002031 | 113.68 (0.15) | -1.323 | 303.8 (2.4) |
| 0.02489 | 0.001512 | 113.64 (0.20) | -0.949 | 309.7 (2.1) |
| 0.05094 | 0.003074 | 113.88 (0.10) | -2.037 | 302.3 (4.0) |
| 0.01009 | 0.000617 | 113.38 (0.50) | -0.396 | 304.1 (6.1) |
| 0.03898 | 0.002352 | 113.96 (0.13) | -1.551 | 303.7 (3.5) |
| 0.04641 | 0.002796 | 113.99 (0.11) | -1.797 | 308.2 (2.4) |
| 0.01903 | 0.001161 | 113.37 (0.27) | -0.778 | 296.9 (7.2) |
| 0.03605 | 0.002177 | 113.93 (0.14) | -1.402 | 307.4 (3.6) |

**Table S4 (cont.)**

| *m*  (mol kg-1) | ()  (g cm-3) | *V*2,ø  (cm3 mol-1) | 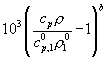 | *Cp*2,ø  (J K-1 mol-1) |
| --- | --- | --- | --- | --- |
| 328.15 K | | | | |
| 0.02496 | 0.001503 | 114.55 (0.21) | -0.844 | 328.9 (3.7) |
| 0.03249 | 0.001950 | 114.69 (0.16) | -1.108 | 328.2 (12.9) |
| 0.04038 | 0.002421 | 114.69 (0.13) | -1.334 | 332.5 (5.3) |
| 0.05535 | 0.003309 | 114.77 (0.09) | -1.859 | 330.3 (4.0) |
| 0.06314 | 0.003771 | 114.78 (0.08) | -2.081 | 332.9 (6.5) |
| 0.06990 | 0.004171 | 114.78 (0.07) | -2.357 | 329.5 (2.6) |
| 0.07756 | 0.004613 | 114.93 (0.07) | -2.600 | 330.8 (2.0) |
| 0.08617 | 0.005128 | 114.83 (0.06) | -2.902 | 329.7 (3.4) |

a Uncertainties are shown in parentheses.

b Heat capacity ratios have not been corrected using the heat leak correction factor.

**Table S5.** Calculated values of and and the slopes *S*v and *S*c for eqns. (3) and (6).

| *T*  (K) | (cm3 mol-1) | *S*v  (cm3 kg mol-2) | (J K-1 mol-1) | *S*c  (J kg K-1 mol-2) |
| --- | --- | --- | --- | --- |
| c(GlySer) | | | | |
| 288.15 | 93.31 ± 0.12 | 5.5 ± 1.7 | 177.8 ± 6.3 | -- |
| 298.15 | 94.82 ± 0.13 | 2.2 ± 1.8 | 201.6 ± 2.7 | -- |
| 313.15 | 96.32 ± 0.12 | -- | 236.5 ± 2.5 | -59 ± 37 |
| 328.15 | 97.79 ± 0.13 | -2.7 ± 1.9 | 253.4 ± 4.3 | -- |
| c(AlaGly) | | | | |
| 288.15 | 93.38 ± 0.13 | 2.7 ± 1.8 | 199.4 ± 3.2 | -- |
| 298.15 | 94.46 ± 0.12 | 4.5 ± 1.6 | 217.5 ± 2.7 | -- |
| 313.15 | 96.27 ± 0.13 | 1.9 ± 1.8 | 243.8 ± 2.6 | -- |
| 328.15 | 97.84 ± 0.12 | -- | 257.2 ± 4.1 | -- |
| c(AlaSer) | | | | |
| 288.15 | 110.60 ± 0.12 | -- | 288.3 ± 7.3 | -- |
| 298.15 | 111.48 ± 0.12 | 3.2 ± 1.8 | 306.0 ± 1.4 | 77 ± 27 |
| 313.15 | 113.06 ± 0.12 | 4.2 ± 1.8 | 336.2 ± 3.9 | -- |
| 328.15 | 114.38 ± 0.12 | -- | 351.0 ± 3.3 | 87 ± 43 |
| c(SerSer) | | | | |
| 288.15 | 110.38 ± 0.13 | -- | 245.9 ± 4.8 | -- |
| 298.15 | 112.18 ± 0.13 | -3.1 ± 1.9 | 273.0 ± 3.1 | -- |
| 313.15 | 113.36 ± 0.23 | 12.2 ± 5.5 | 304.5 ± 4.3 | -- |
| 328.15 | 114.54 ± 0.14 | 3.9 ± 1.9 | 330.4 ± 6.0 | -- |

**Table S6**. Calculated coefficients for eqn. 4.a

| Compound | *a*0  (cm3mol-1) | *a*1  (cm3mol-1K-1) | *a*2  (cm3mol-1K-2) |
| --- | --- | --- | --- |
| c(GlySer) | 95.87 (0.10) | 0.1100 (0.0041) | -0.00079 (0.00036) |
| c(AlaGly) | 95.625 (0.062) | 0.1125 (0.0041) | – |
| c(AlaSer) | 112.500 (0.039) | 0.0958 (0.0026) | – |
| c(SerSer) | 113.25 (0.15) | 0.1014 (0.0046) | -0.00195 (0.00046) |

a Estimated uncertainties are shown in parentheses.

**Table S7**. Alanine and serine side-chain contributions to partial molar volumes and heat capacities at infinite dilution. Values have been calculated using eqns. (7), (8), (9), (10), and (11).a

| *T*  (K) | (CH3)  (cm3 mol-1) | (CH3)  (J K-1 mol-1) |
| --- | --- | --- |
| Eqn. (7): |  |  |
| 288.15 | 28.21 (0.15) | 157.6 (3.4) |
| 298.15 | 27.86 (0.14) | 153.4 (2.9) |
| 313.15 | 27.84 (0.15) | 151.2 (2.8) |
| 328.15 | 27.85 (0.14) | 147.0 (4.2) |
| Eqn. (11): |  |  |
| 288.15 | 27.85 (0.18) | 190.5 (9.7) |
| 298.15 | 26.91 (0.19) | 182.1 (3.1) |
| 313.15 | 26.60 (0.18) | 173.9 (4.6) |
| 328.15 | 26.13 (0.19) | 168.2 (5.4) |
|  | (CH2OH) | (CH2OH) |
| Eqn. (8): |  |  |
| 288.15 | 28.14 (0.14) | 135.6 (6.4) |
| 298.15 | 28.22 (0.15) | 137.5 (2.9) |
| 313.15 | 27.89 (0.14) | 143.9 (2.7) |
| 328.15 | 27.80 (0.15) | 143.2 (4.4) |
| Eqn. (9): |  |  |
| 288.15 | 27.89 (0.16) | 141.9 (4.9) |
| 298.15 | 27.92 (0.16) | 143.3 (3.3) |
| 313.15 | 27.40 (0.25) | 143.0 (4.5) |
| 328.15 | 27.05 (0.17) | 145.3 (6.1) |
| Eqn. (10): |  |  |
| 288.15 | 27.78 (0.19) | 168.9 (8.0) |
| 298.15 | 27.27 (0.18) | 166.2 (3.1) |
| 313.15 | 26.65 (0.19) | 166.6 (4.7) |
| 328.15 | 26.08 (0.18) | 164.4 (5.3) |
|  |  |  |

a Estimated uncertainties are shown in parentheses.
